# Supplementary material for: Ancient oral microbiomes support gradual Neolithic dietary shifts towards agriculture
Source: PubMed Central journal article supplement (PMC9681849; doi:10.1038/s41467-022-34416-0), 2022-11-22
Supplement: 41467_2022_34416_MOESM14_ESM.pdf [file 41467_2022_34416_MOESM14_ESM.pdf]

## Reporting Summary

Nature Portfolio wishes to improve the reproducibility of the work that we publish. This form provides structure for consistency and transparency in reporting. For further information on Nature Portfolio policies, see our [Editorial Policies](#) and the [Editorial Policy Checklist](#).

### Statistics

For all statistical analyses, confirm that the following items are present in the figure legend, table legend, main text, or Methods section.

n/a Confirmed

- The exact sample size ( $n$ ) for each experimental group/condition, given as a discrete number and unit of measurement
- A statement on whether measurements were taken from distinct samples or whether the same sample was measured repeatedly
- The statistical test(s) used AND whether they are one- or two-sided  
*Only common tests should be described solely by name; describe more complex techniques in the Methods section.*
- A description of all covariates tested
- A description of any assumptions or corrections, such as tests of normality and adjustment for multiple comparisons
- A full description of the statistical parameters including central tendency (e.g. means) or other basic estimates (e.g. regression coefficient) AND variation (e.g. standard deviation) or associated estimates of uncertainty (e.g. confidence intervals)
- For null hypothesis testing, the test statistic (e.g.  $F$ ,  $t$ ,  $r$ ) with confidence intervals, effect sizes, degrees of freedom and  $P$  value noted  
*Give  $P$  values as exact values whenever suitable.*
- For Bayesian analysis, information on the choice of priors and Markov chain Monte Carlo settings
- For hierarchical and complex designs, identification of the appropriate level for tests and full reporting of outcomes
- Estimates of effect sizes (e.g. Cohen's  $d$ , Pearson's  $r$ ), indicating how they were calculated

*Our web collection on [statistics for biologists](#) contains articles on many of the points above.*

### Software and code

Policy information about [availability of computer code](#)

Data collection

Illumina sequence data were processed using the following programs: AdapterRemoval (v2.2.0), Prinseq (v.0.19.1), Kraken2 (v.2.0.8-beta), Bracken (v.2.5), Dustmasker (v.1.0.0), Burrows-Wheeler Alignment (BWA v.0.7.15), PMDtools (v.0.60), OxCal (v.4.4). These programs are publicly available

Data analysis

Data analyses were performed using several packages from R software (v.3.6.3): microViz (v.0.9.0), cluster (v.2.1.0), phyloseq (v.1.30.0), NetCoMi (v.1.0.2), k-nearest neighbour (k-nn) algorithm is implemented in NetCoMi package, radiant (v.1.4.0), vcd (v. 1.4-9), DESeq2 (v.1.26.0), ggplot2 (v.3.3.5).

Other programs were used for microbiome data analysis: HUMAnN 2.0, LEfSe (v.1.0), MaAsLin v.1.0

Metagenomes assembly and analysis were performed using: SPAdes (v.3.15.3), SAMtools (v.1.9), Bowtie2 (v.2.3.5.1), MetaBAT 2 (v.2.12.1), CheckM (v.1.1.6), BLAST Ring Image Generator (BRIG) (v.0.95), PATRIC (v.3.6.12), RAxML (v.8.2.11)

For manuscripts utilizing custom algorithms or software that are central to the research but not yet described in published literature, software must be made available to editors and reviewers. We strongly encourage code deposition in a community repository (e.g. GitHub). See the Nature Portfolio [guidelines for submitting code & software](#) for further information.

## Data

Policy information about [availability of data](#)

All manuscripts must include a [data availability statement](#). This statement should provide the following information, where applicable:

- Accession codes, unique identifiers, or web links for publicly available datasets
- A description of any restrictions on data availability
- For clinical datasets or third party data, please ensure that the statement adheres to our [policy](#)

All the sequence data generated for this study have been deposited BioProject Database with the ID: PRJNA791766  
Code is available at <https://github.com/AndreaQ7/HuME/>  
Human Oral Microbiome Database is available at <https://www.homd.org/>  
NCBI Reference Sequence (RefSeq) database is available at <https://www.ncbi.nlm.gov/refseq/>

## Human research participants

Policy information about [studies involving human research participants and Sex and Gender in Research](#).

|                             |    |
|-----------------------------|----|
| Reporting on sex and gender | NA |
| Population characteristics  | NA |
| Recruitment                 | NA |
| Ethics oversight            | NA |

Note that full information on the approval of the study protocol must also be provided in the manuscript.

## Field-specific reporting

Please select the one below that is the best fit for your research. If you are not sure, read the appropriate sections before making your selection.

- Life sciences       Behavioural & social sciences       Ecological, evolutionary & environmental sciences

For a reference copy of the document with all sections, see [nature.com/documents/nr-reporting-summary-flat.pdf](https://nature.com/documents/nr-reporting-summary-flat.pdf)

## Ecological, evolutionary & environmental sciences study design

All studies must disclose on these points even when the disclosure is negative.

|                          |                                                                                                                                                                                                                                                                                                                                                                                                                                                                                                                                                                                                                                                                                                                                                                                       |
|--------------------------|---------------------------------------------------------------------------------------------------------------------------------------------------------------------------------------------------------------------------------------------------------------------------------------------------------------------------------------------------------------------------------------------------------------------------------------------------------------------------------------------------------------------------------------------------------------------------------------------------------------------------------------------------------------------------------------------------------------------------------------------------------------------------------------|
| Study description        | This study includes the analysis of 79 ancient dental calculus from hunter-gatherer Paleolithic (31,000 BC), Neolithic farmers (6,200-4,000) and Copper Age (3,500-2,000), combining de novo metagenomic sequencing (76 samples) with microscopic analysis (27 samples). Microbiome profiles were obtained through Kraken2 and Bracken softwares, and analysed for their biodiversity using several R software packages.                                                                                                                                                                                                                                                                                                                                                              |
| Research sample          | Research samples are composed by three main cultural groups: Hunter-gatherer from Paleolithic, early farmers' communities from Neolithic and farmers' samples from Copper Age. Further sub-division based on specific cultural background (archaeologically-defined) were reported on SI and Supp. Table 1. We collected all the available archaeological, cultural and anthropological information for each sample and site considered (see Supp. Table 1). Samples were analysed for their oral microbial biodiversity with an unsupervised approach, performing cluster analysis to highlight possible groups within our dataset. Then, we associate the identified clusters with the available metadata, in order to identify the main variable at the basis of cluster division. |
| Sampling strategy        | In order to minimize the effect of geography on the microbiome composition, we decide to collect samples that belong to a restricted geographic area across a long period of time. Moreover, samples that belong to multiple coeval archaeological sites were collected in order to discriminate the possible site-effect on the overall trend associable to each time period considered in this study.                                                                                                                                                                                                                                                                                                                                                                               |
| Data collection          | Depending on samples location, different local authorities and researchers were present during the collection. Details about their role during the collection of samples belonging to different site and periods are reported in the Author Contributions section of the article. A.Quagliariello and A.Modi were involved in dental calculus collection using 2mL sterile tubes. Archaeological and Anthropological data were transferred through Excel files from the local Archaeological authorities to A.Quagliariello. Samples were extracted and sequenced at the dedicated aDNA clean laboratory at the Department of Biology of the University of Florence (Italy), using Illumina NovaSeq 6000 platform in paired-end mode with 2x51+8+8 cycles.                            |
| Timing and spatial scale | Samples were analyzed over the period January 2020 - February 2021. Detailed information about the archaeological samples analyzed are provided in Supp. Table 1, SI and Fig. 1.                                                                                                                                                                                                                                                                                                                                                                                                                                                                                                                                                                                                      |

|                                   |                                                                                                                                                                                                                                                                                                                                                                                                                                                                                                                                                                                                                                                                                                                                                                                                                                                    |
|-----------------------------------|----------------------------------------------------------------------------------------------------------------------------------------------------------------------------------------------------------------------------------------------------------------------------------------------------------------------------------------------------------------------------------------------------------------------------------------------------------------------------------------------------------------------------------------------------------------------------------------------------------------------------------------------------------------------------------------------------------------------------------------------------------------------------------------------------------------------------------------------------|
| Data exclusions                   | We excluded samples only if the samples do not meet the quality criteria, either by having low level of endogenous microbial DNA or by showing high level of environmental contamination estimates.                                                                                                                                                                                                                                                                                                                                                                                                                                                                                                                                                                                                                                                |
| Reproducibility                   | We took multiple individuals from each archaeological site, if available, to support the representativeness of their metagenomic profiles. Due to the limited amount and the precious nature of the archaeological biological materials, repeated genome data collection on the same individual was not performed. As required by the field standards, several bioinformatic analyses were applied to the sequencing data of each sample in order to authenticate ancient microbiome data and exclude possible environmental contamination. Each samples required to pass a quality control to ensure the presence of authentic endogenous ancient DNA and no environmental contamination. Repeated genome data collection on the same individual is not considered as necessary nor useful in the field standard and therefore was not performed. |
| Randomization                     | Randomization was not applicable because this study is observational and did not include any case/control comparison or treatment.                                                                                                                                                                                                                                                                                                                                                                                                                                                                                                                                                                                                                                                                                                                 |
| Blinding                          | There was no experimental treatment of samples involved in this study that requires blinding. Data analysis was performed based on the analysis groups that were defined by external information such as archaeological context and date.                                                                                                                                                                                                                                                                                                                                                                                                                                                                                                                                                                                                          |
| Did the study involve field work? | <input checked="" type="checkbox"/> Yes <input type="checkbox"/> No                                                                                                                                                                                                                                                                                                                                                                                                                                                                                                                                                                                                                                                                                                                                                                                |

## Field work, collection and transport

|                        |                                                                                                                                                                                                                                                                                                                                                  |
|------------------------|--------------------------------------------------------------------------------------------------------------------------------------------------------------------------------------------------------------------------------------------------------------------------------------------------------------------------------------------------|
| Field conditions       | Samples have been previously excavated, no new excavation were performed. Samples were conserved in different museums and archaeological archive of the Italian Heritage Ministry.                                                                                                                                                               |
| Location               | Samples were stored principally in three different locations: at the archaeological archive of Italian Heritage Ministry in Foggia (41.45 lat, 15.55 long), at the Museums and at the archaeological archive of Italian Heritage Ministry of Ancona (43.5 lat, 13.5 long), and at different Museums in the city of Rome (41.89 lat, 12.51 long). |
| Access & import/export | Samples were collected in accordance with local authorities and with the cooperation of the local archaeologists. Every samples collected received a signed authorization to the treatment and analysis based on written agreement (received before the start of the project).                                                                   |
| Disturbance            | N/A                                                                                                                                                                                                                                                                                                                                              |

## Reporting for specific materials, systems and methods

We require information from authors about some types of materials, experimental systems and methods used in many studies. Here, indicate whether each material, system or method listed is relevant to your study. If you are not sure if a list item applies to your research, read the appropriate section before selecting a response.

### Materials & experimental systems

| n/a                                 | Involved in the study                                             |
|-------------------------------------|-------------------------------------------------------------------|
| <input checked="" type="checkbox"/> | <input type="checkbox"/> Antibodies                               |
| <input checked="" type="checkbox"/> | <input type="checkbox"/> Eukaryotic cell lines                    |
| <input type="checkbox"/>            | <input checked="" type="checkbox"/> Palaeontology and archaeology |
| <input checked="" type="checkbox"/> | <input type="checkbox"/> Animals and other organisms              |
| <input checked="" type="checkbox"/> | <input type="checkbox"/> Clinical data                            |
| <input checked="" type="checkbox"/> | <input type="checkbox"/> Dual use research of concern             |

### Methods

| n/a                                 | Involved in the study                           |
|-------------------------------------|-------------------------------------------------|
| <input checked="" type="checkbox"/> | <input type="checkbox"/> ChIP-seq               |
| <input checked="" type="checkbox"/> | <input type="checkbox"/> Flow cytometry         |
| <input checked="" type="checkbox"/> | <input type="checkbox"/> MRI-based neuroimaging |

## Palaeontology and Archaeology

|                                     |                                                                                                                                                                                                                                                              |
|-------------------------------------|--------------------------------------------------------------------------------------------------------------------------------------------------------------------------------------------------------------------------------------------------------------|
| Specimen provenance                 | Various archaeological sites in Italy; see Supp. Table 1 and the SI for a comprehensive list of archaeological sites, locations, and archaeological/anthropological information.                                                                             |
| Specimen deposition                 | Contact information for each specimen is provided in the SI                                                                                                                                                                                                  |
| Dating methods                      | Radiocarbon dates both calibrated (2 sigma) and uncalibrated are provided at Supp. Table 1.                                                                                                                                                                  |
| <input checked="" type="checkbox"/> | Tick this box to confirm that the raw and calibrated dates are available in the paper or in Supplementary Information.                                                                                                                                       |
| Ethics oversight                    | Study consists of the analysis of previously excavated human archaeological remains, and included no new excavation effort nor study of live human or animal subjects excavation. Partners providing specimens are coauthors on the study. The access to the |

remains were approved by the Italian Heritage Ministry based on the written agreements. Specifically, archaeological samples were collected at the “Soprintendenza Archeologia, Belle Arti e Paesaggio per la Città metropolitana di Bari” in Bari (Italy), at the “Soprintendenza Archeologia, Belle Arti e Paesaggio per le Province di Barletta- Andria -Trani e Foggia” in Foggia (Italy), at the “Soprintendenza Archeologia, Belle Arti e Paesaggio delle Marche” in Ancona (Italy), at the “Museo delle origini” at the University “La Sapienza” in Rome (Italy), and at the museum “Museo delle Civiltà” in Rome (Italy). Each local authority listed above approved the sample collection by written agreement.

Note that full information on the approval of the study protocol must also be provided in the manuscript.
